# Supplementary material
Source: PubMed Central journal article supplement (PMC5442636)

# No antibiotic treatment

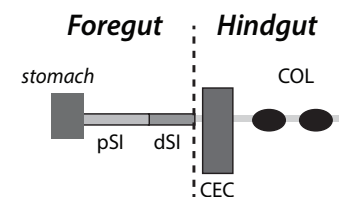

A.

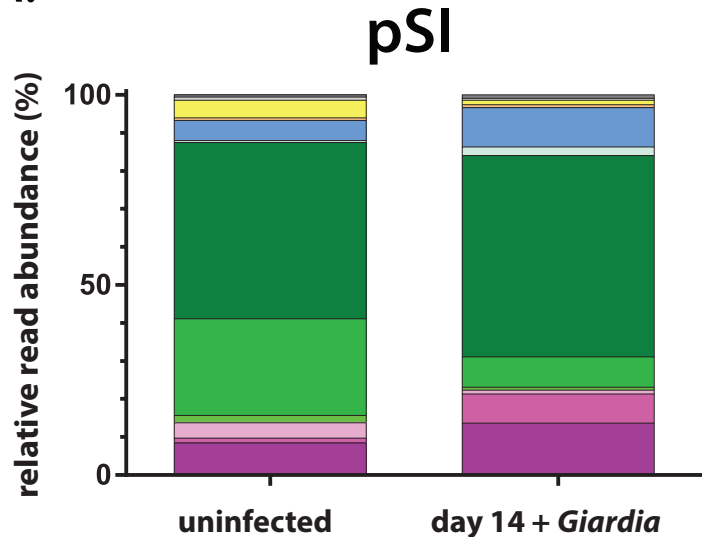

B.

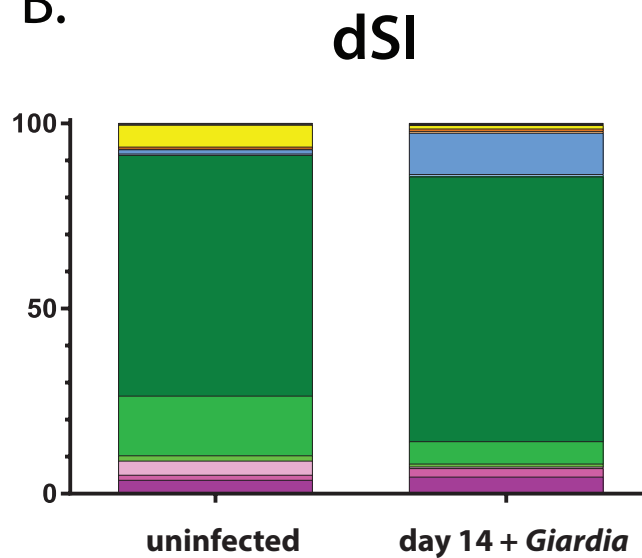

- Other\_Other
- Tenericutes\_Mollicutes
- Melainobacteria
- Actinobacteria\_Actinobacteria
- Actinobacteria\_Coriobacteriia
- Bacteroidetes\_Bacteroidia
- Bacteroidetes\_Flavobacteriia
- Firmicutes\_Bacilli
- Firmicutes\_Clostridia
- Firmicutes\_Erysipelotrichi
- Proteobacteria\_Alphaproteobacteria
- Proteobacteria\_Betaproteobacteria
- Proteobacteria\_Gammaproteobacteria

## Hindgut

C.

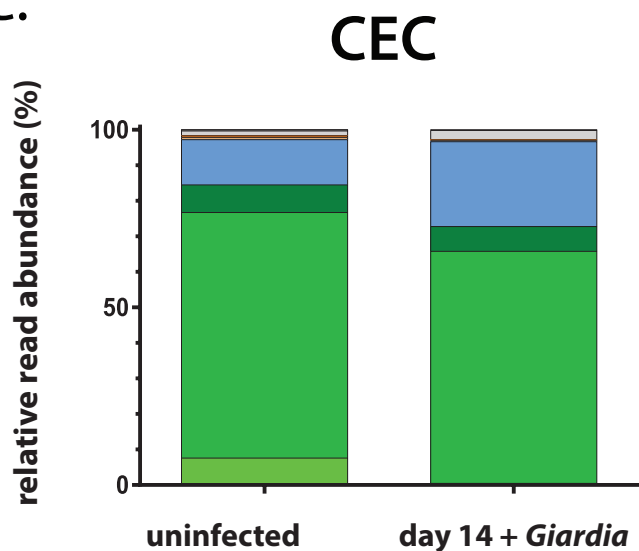

D.

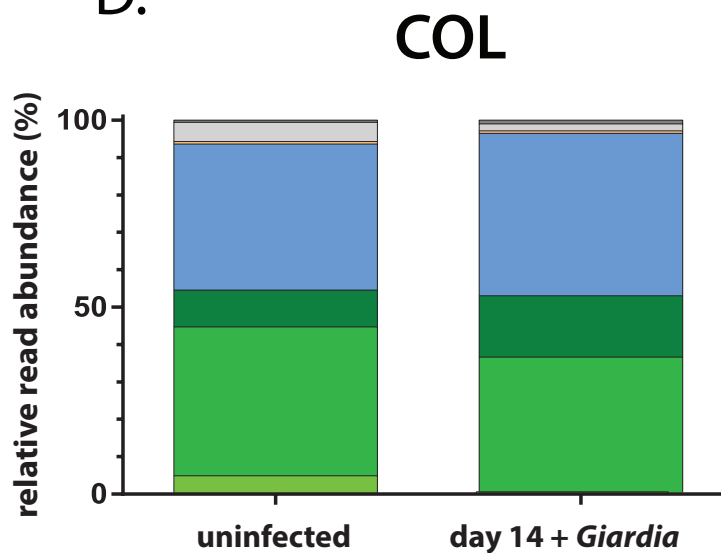

Supplement: IAI.00948-16_zii999092066s5.pdf [file IAI.00948-16_zii999092066s5.pdf]
