# Supplementary material
Source: PubMed Central journal article supplement (PMC5442636)
Supplement: IAI.00948-16_zii999092066s10.pdf [file IAI.00948-16_zii999092066s10.pdf]

| Category Grouping  |             |            | R2 by grouping (% variation in distance explained) |            |                |                           |               |
|--------------------|-------------|------------|----------------------------------------------------|------------|----------------|---------------------------|---------------|
| <i>Days</i>        | <i>Site</i> | <i>ABX</i> | <i>Giardia</i>                                     | <i>ABX</i> | <i>Subsite</i> | <i>Foregut vs Hindgut</i> | <i>Day PI</i> |
| All Days           | All         | All        | 2.29                                               | 8.2        | 9.3            | 7                         | 3.4           |
| All Days           | All         | +          | 2.8                                                |            | 9.1            | 5.4                       | 3.3           |
|                    |             | -          | 2.4                                                |            | 22.9           | 18.8                      | 4             |
| Days 0 and 14 only | Foregut     | +          | 10.8                                               |            | 7.3            |                           |               |
|                    |             | -          | 9.6                                                |            | ns             |                           |               |
|                    | Hindgut     | +          | 28.5                                               |            | ns             |                           |               |
|                    |             | -          | 25.7                                               |            | ns             |                           |               |

Subsite: Mucosal, Luminal, Total, Cecum, Feces

Hindgut (Cecum + Feces) vs Foregut (Mucosal, Luminal, Total)

NS: p>0.05
