# Supplementary material
Source: PubMed Central journal article supplement (PMC5442636)

**A.**

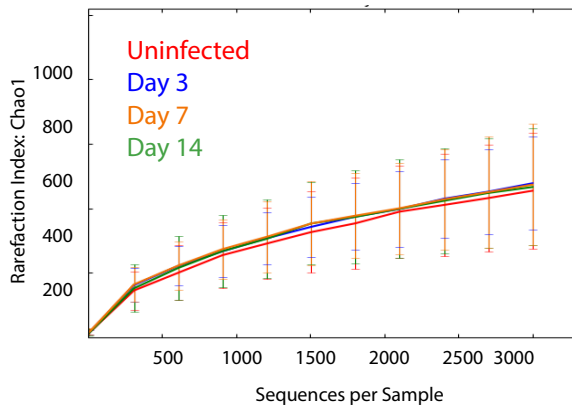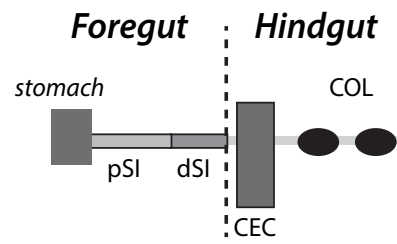

**B.**

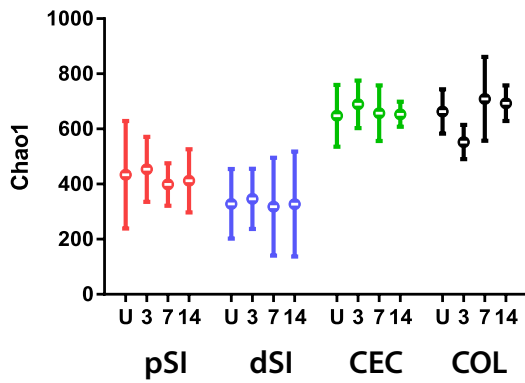

**C.**

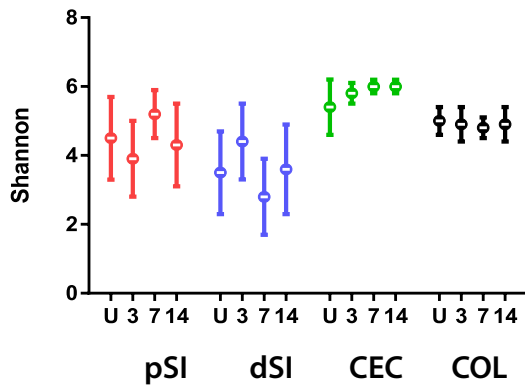

**D.**

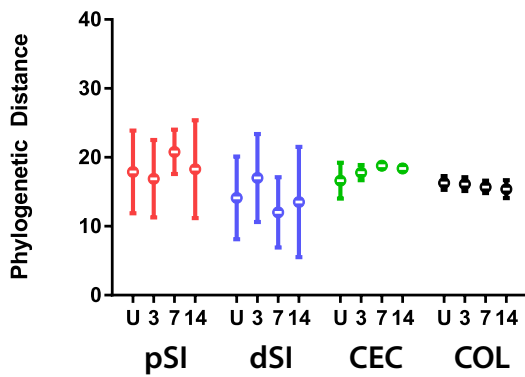

Supplement: IAI.00948-16_zii999092066s2.pdf [file IAI.00948-16_zii999092066s2.pdf]

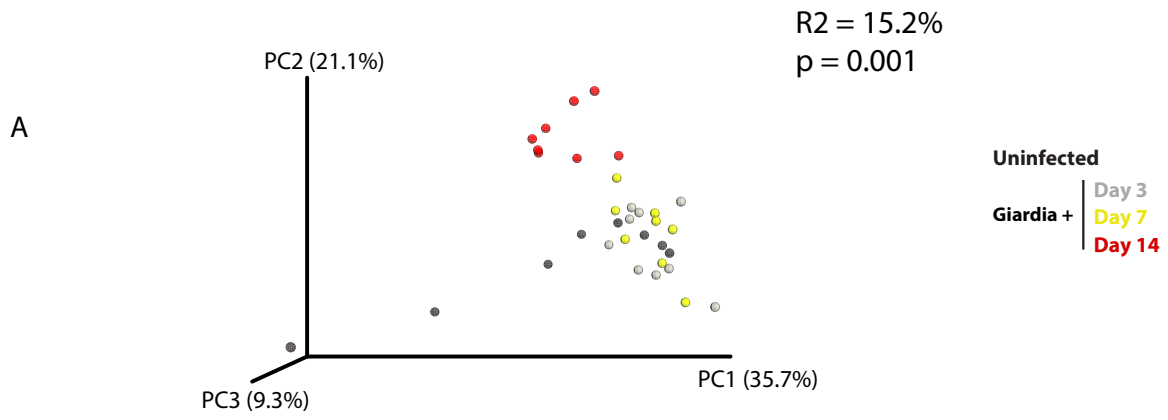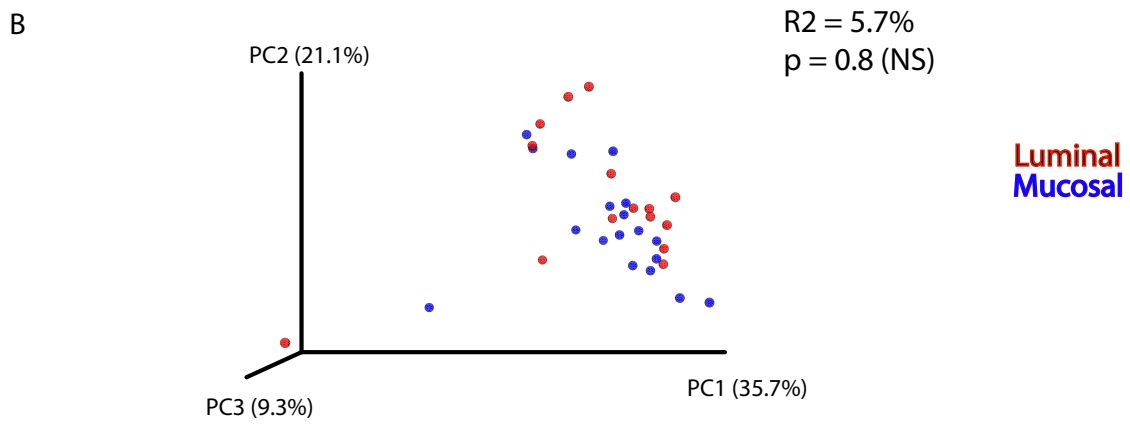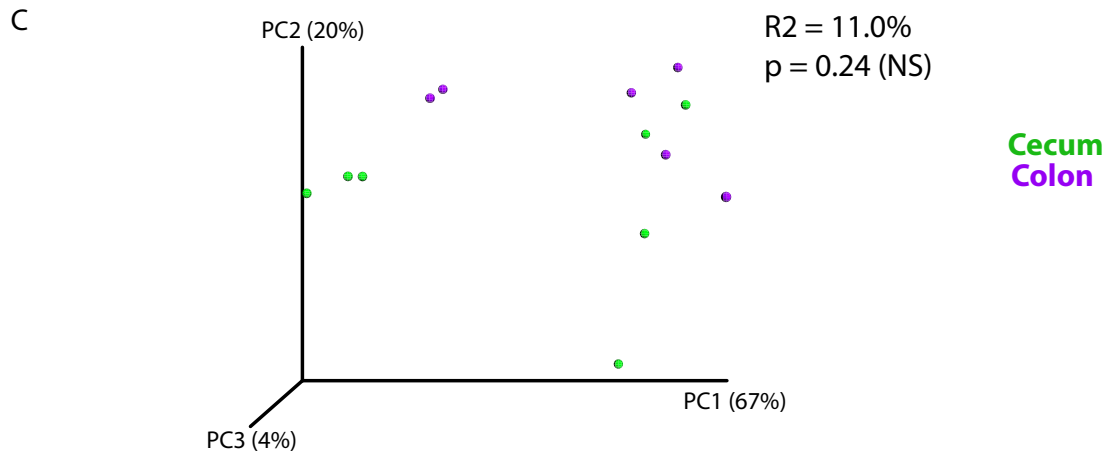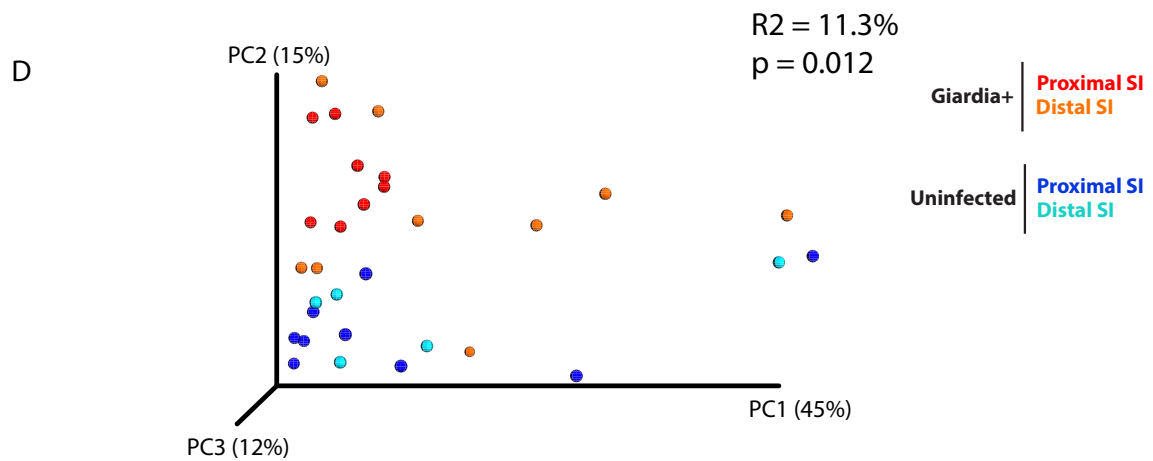

Supplement: IAI.00948-16_zii999092066s3.pdf [file IAI.00948-16_zii999092066s3.pdf]

With Antibiotic Treatment **Uninfected**  
**Infected**

### Foregut

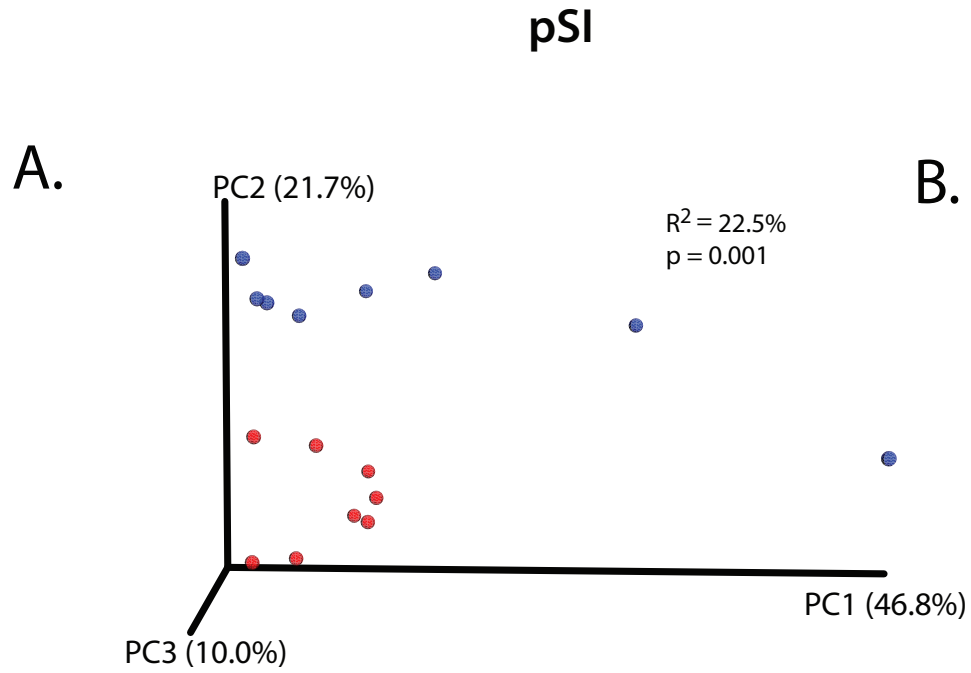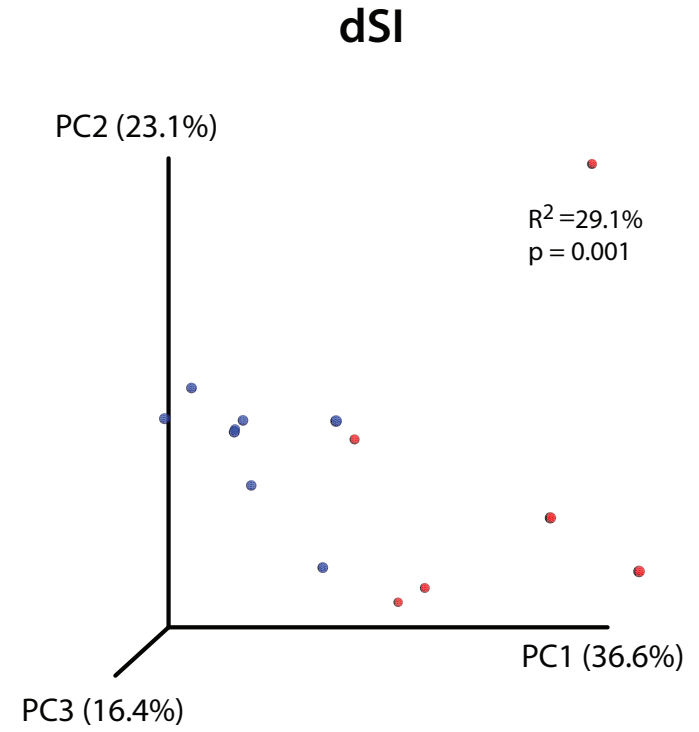

### Hindgut

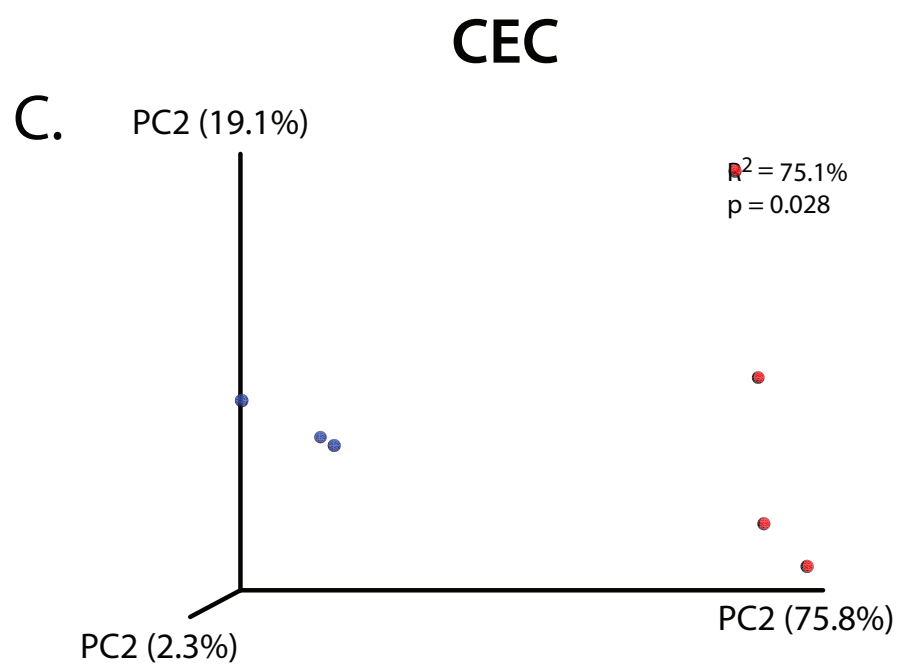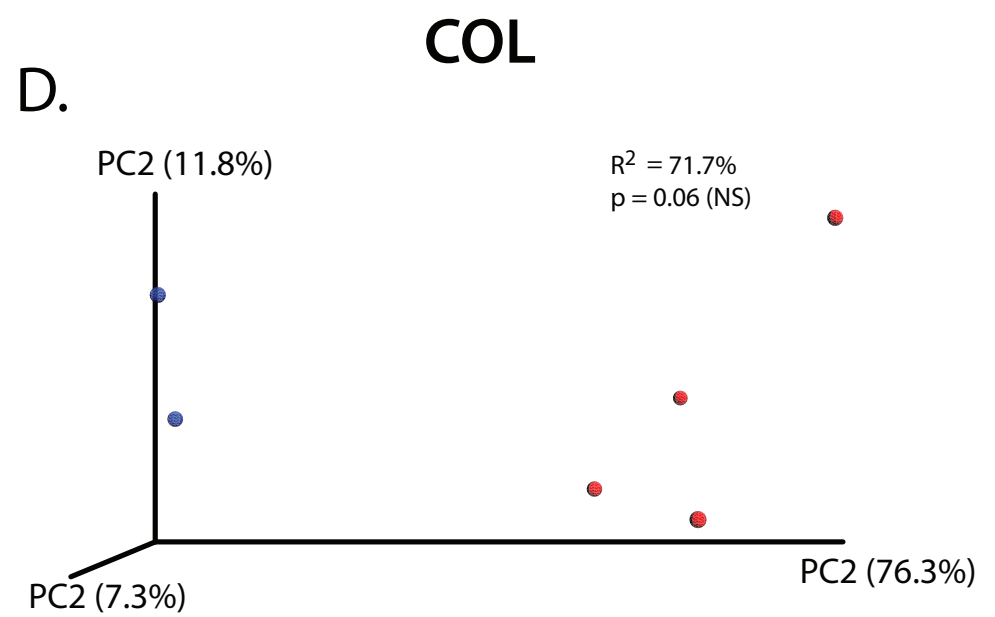

Supplement: IAI.00948-16_zii999092066s4.pdf [file IAI.00948-16_zii999092066s4.pdf]

No Antibiotic Treatment

Uninfected  
Infected

*Foregut*

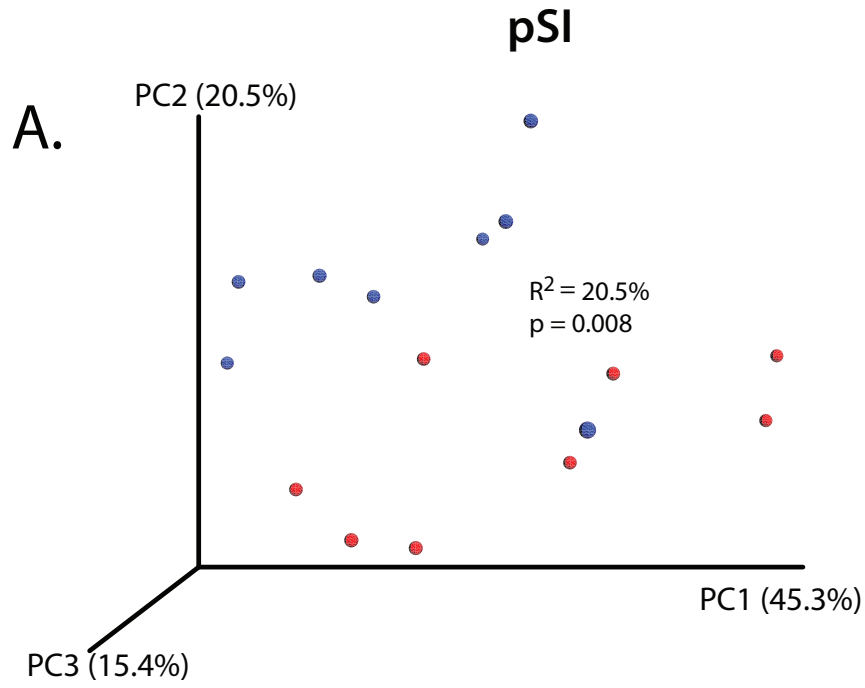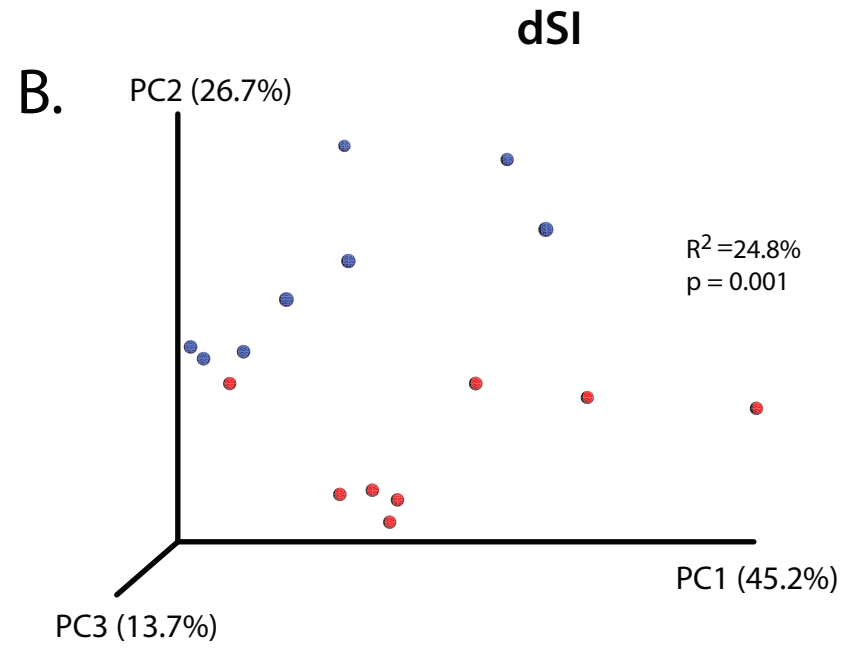

*Hindgut*

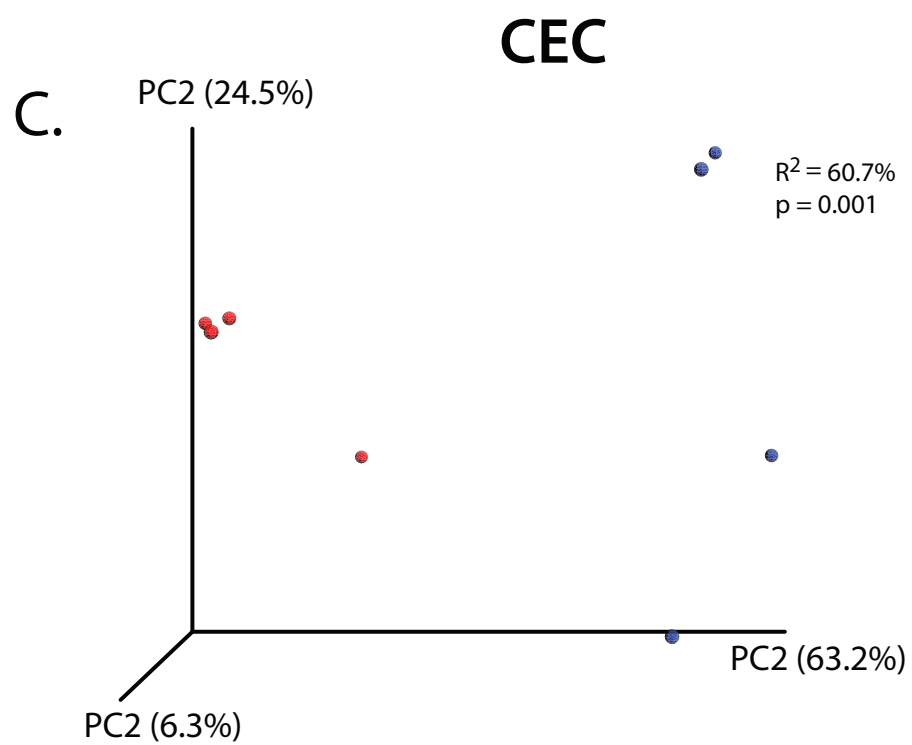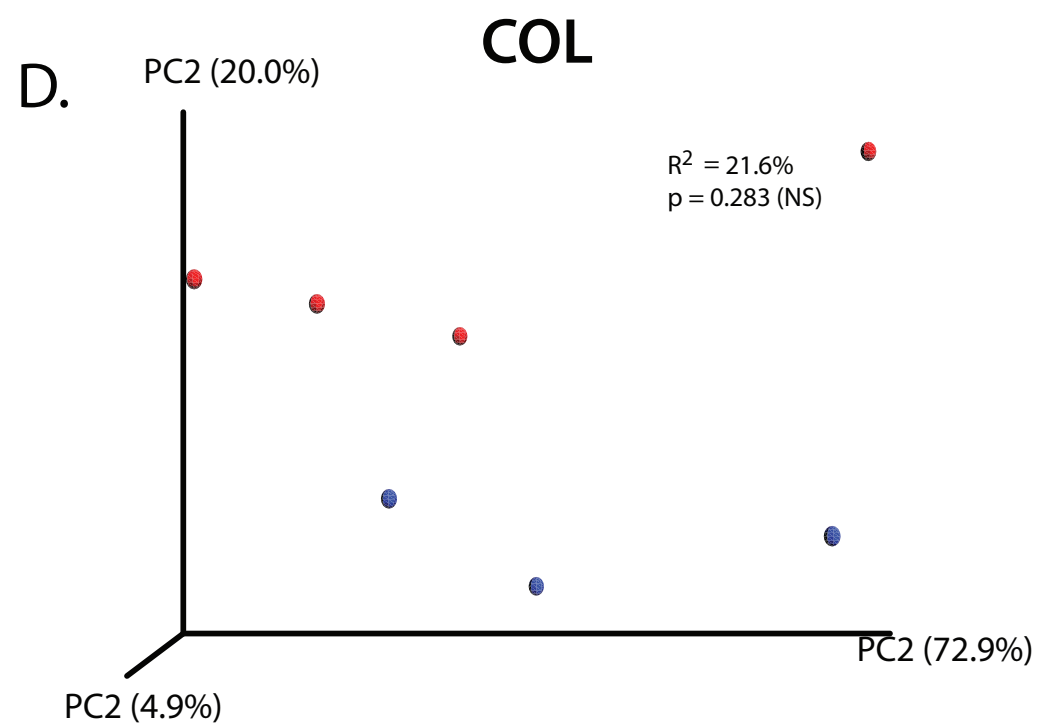

Supplement: IAI.00948-16_zii999092066s6.pdf [file IAI.00948-16_zii999092066s6.pdf]

# No antibiotic treatment

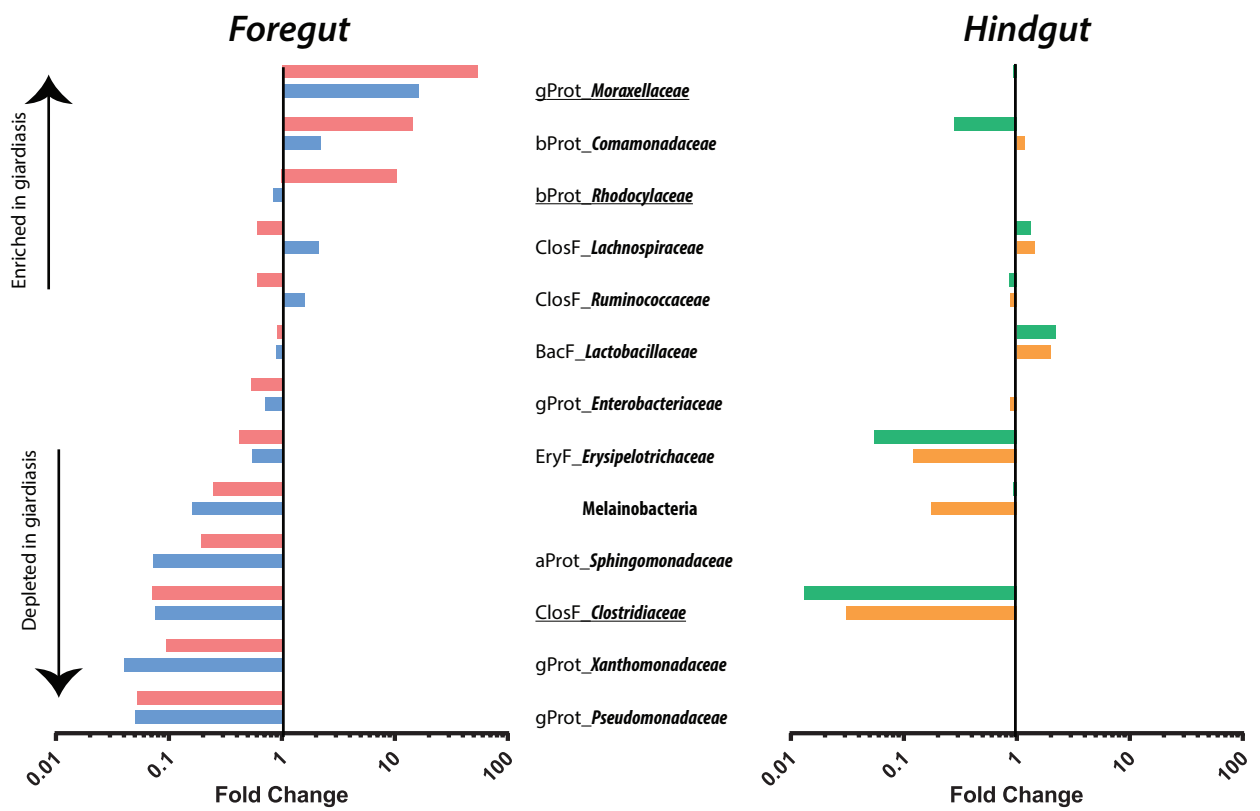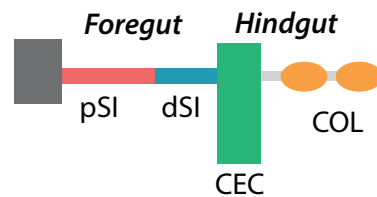

Supplement: IAI.00948-16_zii999092066s7.pdf [file IAI.00948-16_zii999092066s7.pdf]

# No antibiotic treatment

A.

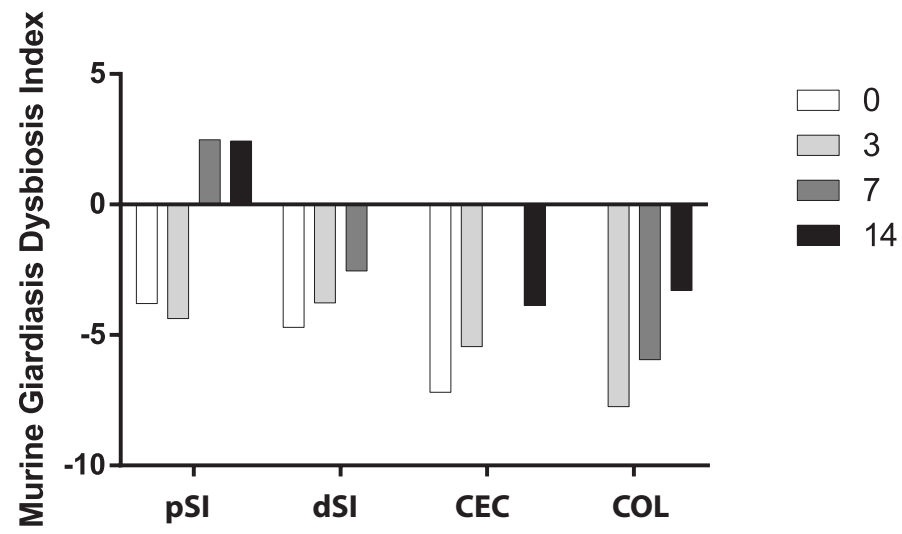

B.

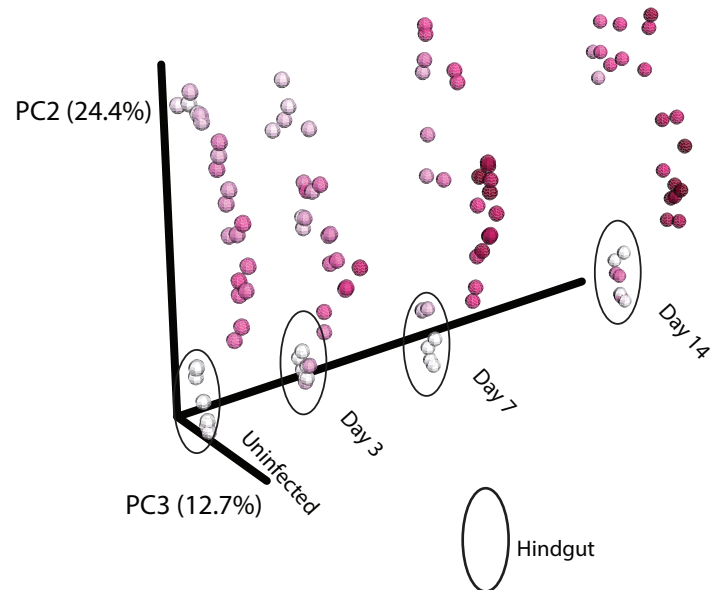

Supplement: IAI.00948-16_zii999092066s8.pdf [file IAI.00948-16_zii999092066s8.pdf]
